# Supplementary material
Source: PubMed Central journal article supplement (PMC9464645)
Supplement: mmc1.pdf [file mmc1.pdf]

## **Supplemental information**

### **Self-assembling short immunostimulatory duplex**

#### **RNAs with broad-spectrum antiviral activity**

**Longlong Si, Haiqing Bai, Crystal Yuri Oh, Amanda Jiang, Fan Hong, Tian Zhang, Yongxin Ye, Tristan X. Jordan, James Logue, Marisa McGrath, Chaitra Belgur, Karina Calderon, Atiq Nurani, Wuji Cao, Kenneth E. Carlson, Rachelle Prantil-Baun, Steven P. Gygi, Dong Yang, Colleen B. Jonsson, Benjamin R. tenOever, Matthew Frieman, and Donald E. Ingber**

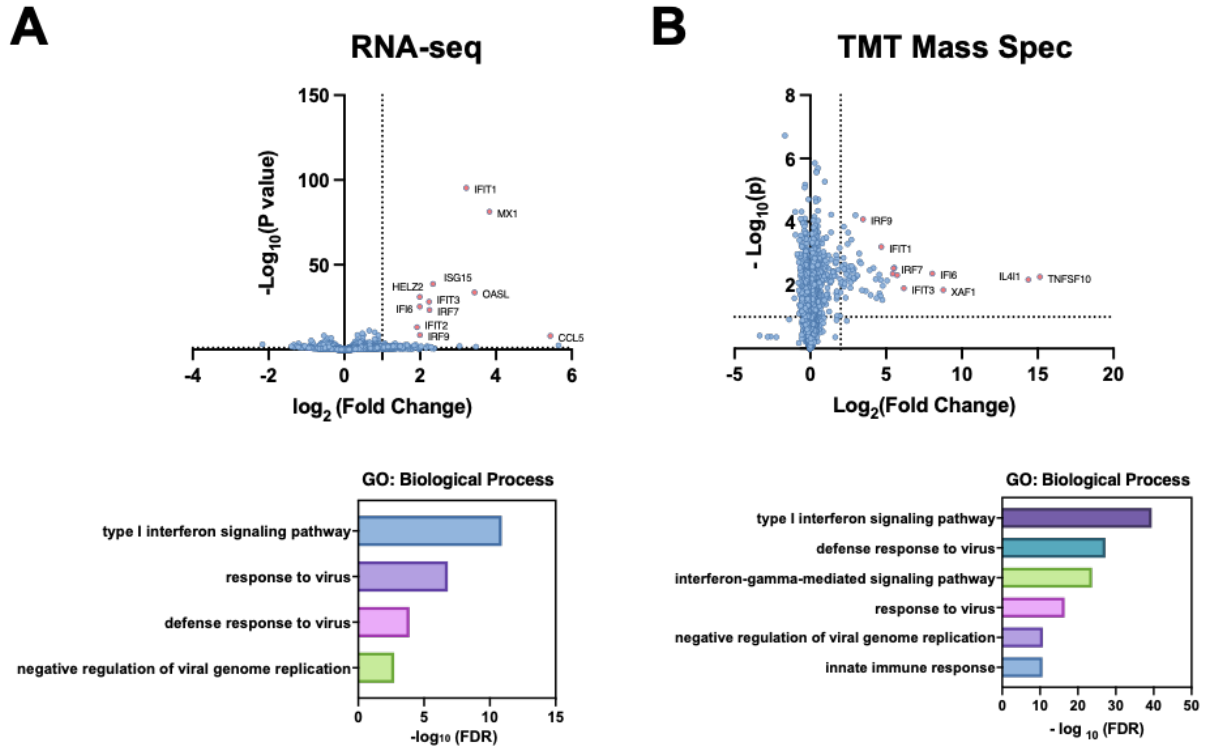

**Figure S1. Profiling the effects of RNA-2 by RNA-seq and TMT mass spectrometry.** A549 cells were transfected with RNA-2 or scrambled RNA control, cell lysates were collected at 48 h, and analyzed by RNA-seq (left) or TMT Mass Spec (right). Differentially expressed genes (DEGs) or proteins are shown in volcano plots (top) and GO Enrichment analysis was performed for the DEGs (bottom) (N = 3). Plot (top) and GO Enrichment analysis was performed for the differentially expressed proteins (bottom) (N = 3).

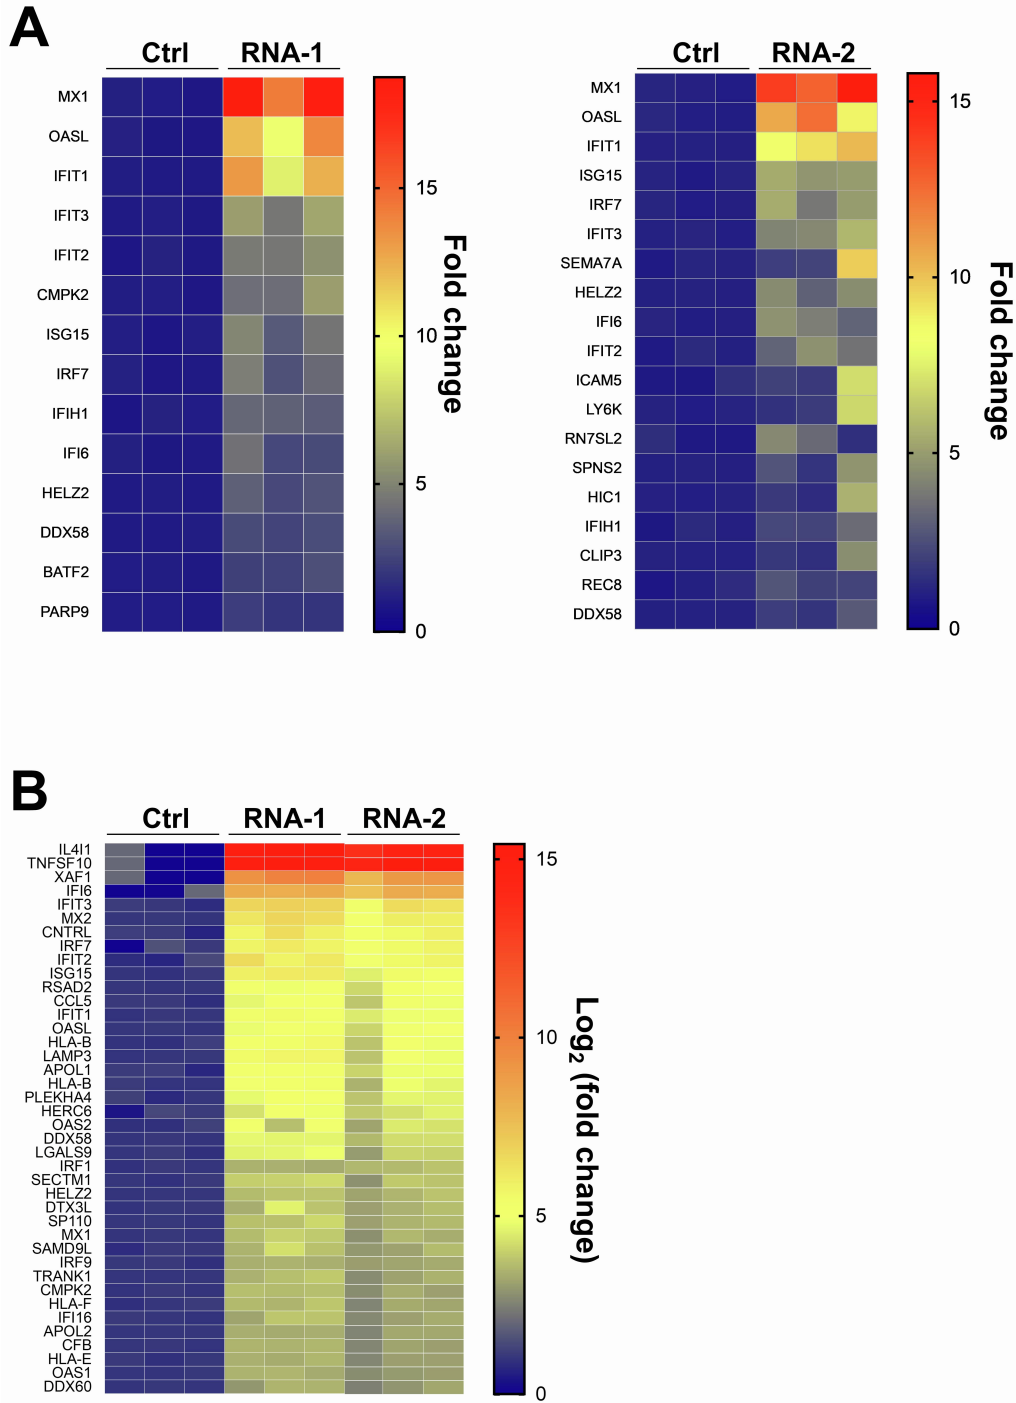

**Figure S2. Heat maps showing the effects of immunostimulatory RNAs on IFN pathway-relevant gene levels. DEGs from RNA-seq (A) and differentially expressed proteins from TMT Mass Spec analyses (B) shown in Fig. 1B and fig. S1 are presented here as heat maps (gene levels of the scrambled RNA control were set as 1; N = 3).**

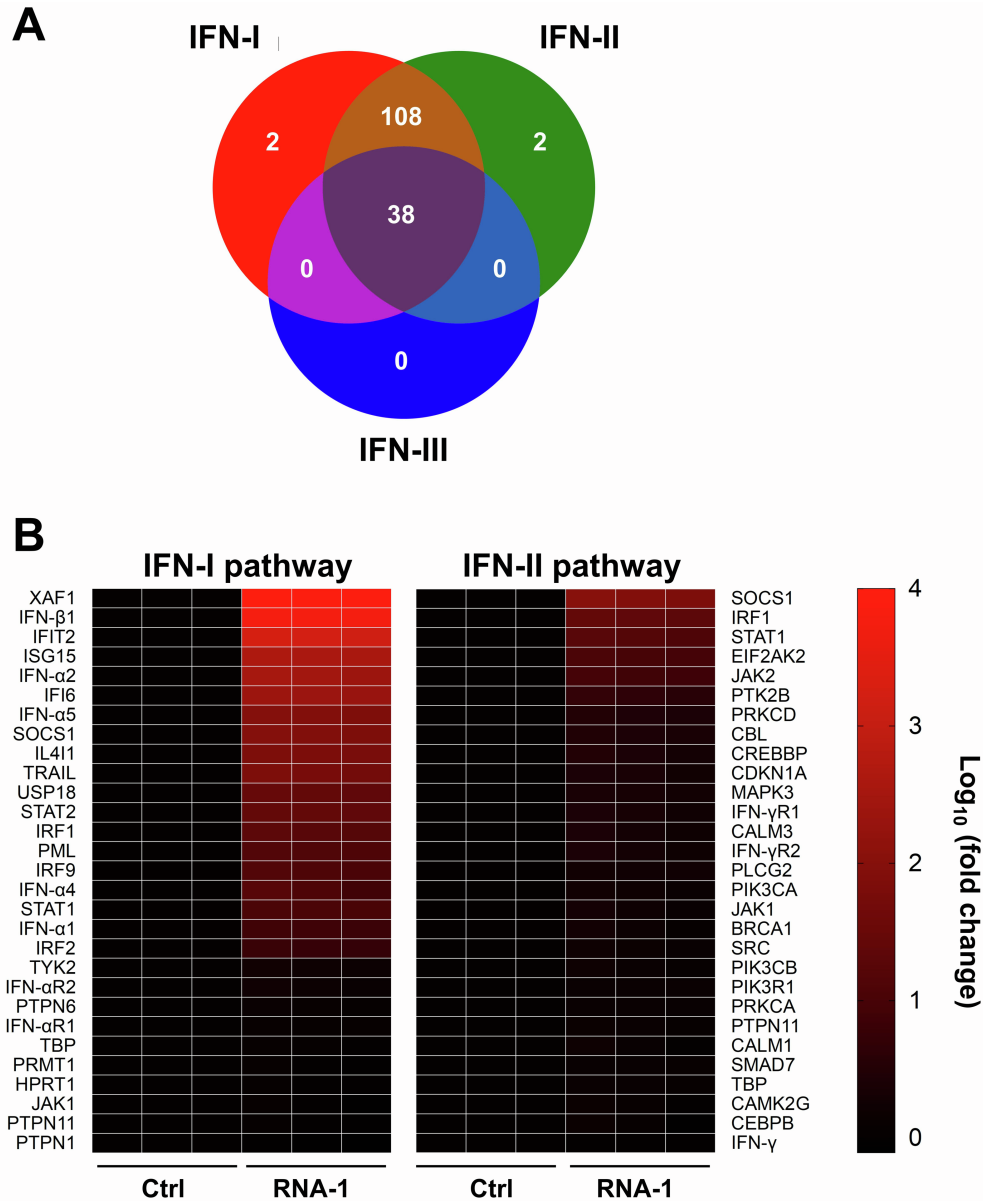

**Figure S3. RNA-induced gene expression associated with type I interferon pathway. (A)** Venn diagram showing differentially expressed ISGs from TMT Mass Spec by RNA-1 belong to type I or type II interferon stimulated genes. **(B)** Heat map of qPCR results showing RNA-I preferentially activates type I interferon pathway. A549 cells were transfected with RNA-1 or scrambled dsRNA control, collected at 48 hr and analyzed by qPCR (expression levels were normalized to GAPDH; gene levels induced by the RNA control were set as 1; N = 3).

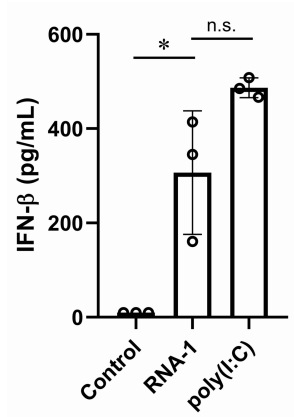

**Figure S4. The levels of IFN- $\beta$  protein induced by RNA-1 and poly(I:C).** A549 cells were transfected with RNA-1 or poly(I:C) (34 nM) for 48 h, and then supernatants were collected for detection of IFN- $\beta$  using ELISA. Scrambled RNA control NC-1 is used as negative (N = 3). \*, P < 0.05; n.s., not significant.

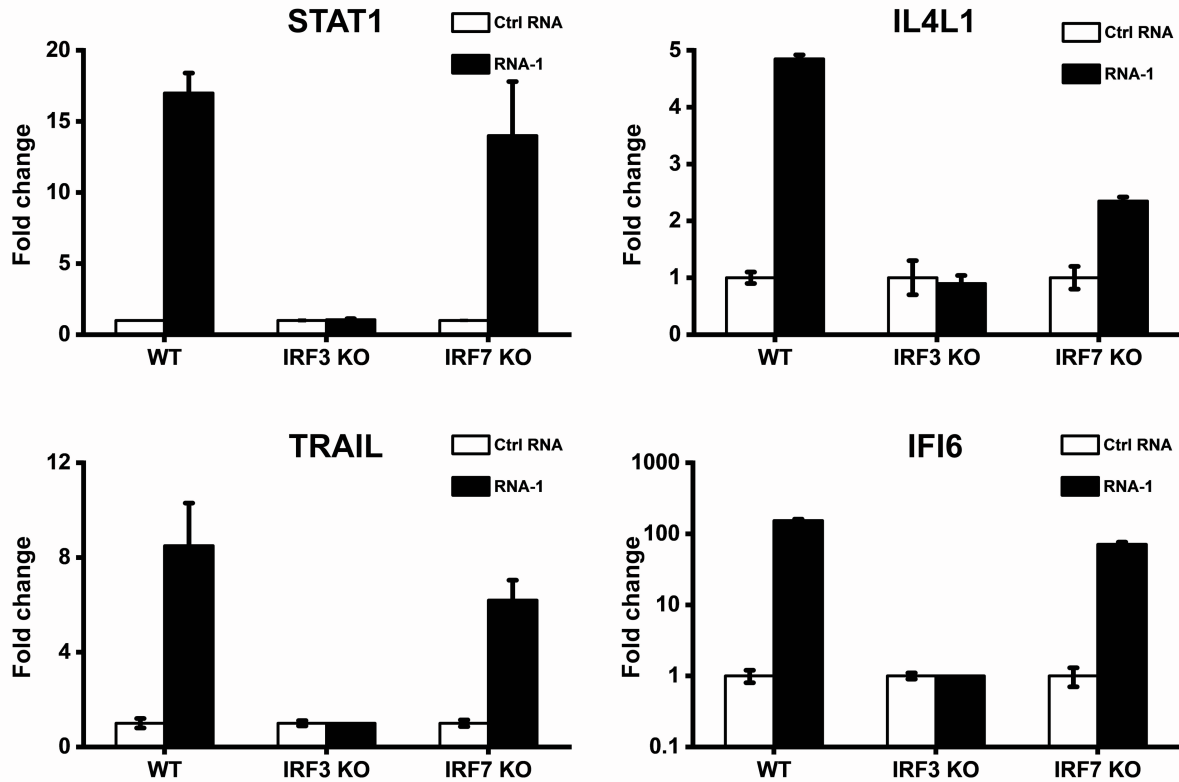

**Figure S5. IRF3 knockout abolished the ability of immunostimulatory RNAs to induce IFN-I pathway associated genes.** Wild-type (WT) HAP1 cells, IRF3 knockout HAP1 cells, or IRF7 knockout HAP1 cells were transfected with RNA-1 or a scrambled RNA control and STAT1, IL4L1, TRAIL, and IFI6 mRNA levels were quantified by qPCR at 48 h post transfection. Data are presented as fold change relative to RNA control (N = 3).

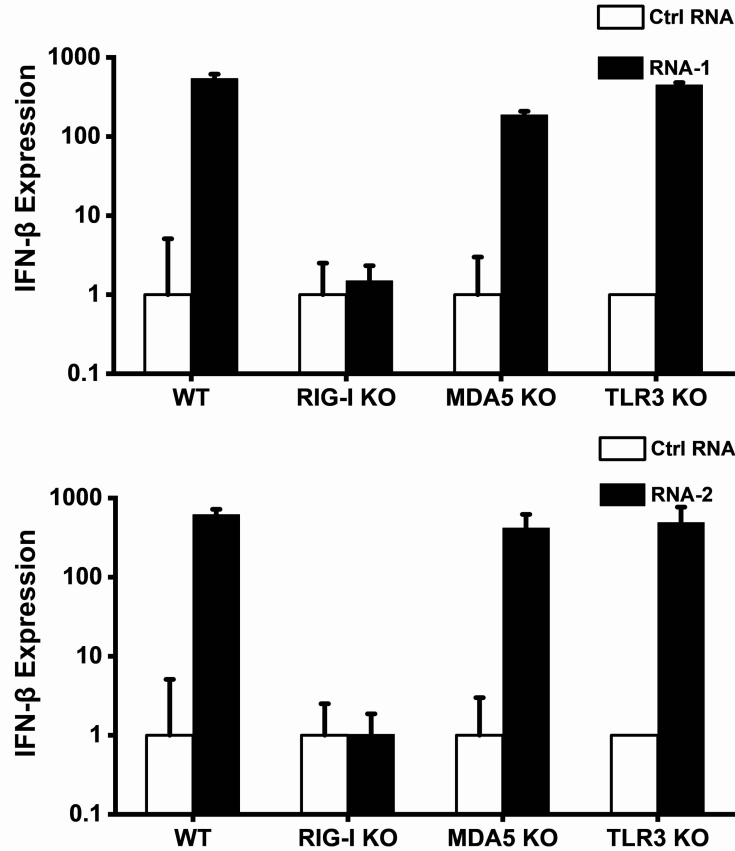

**Figure S6. RIG-I knockout abolished the induction effects of the immunostimulatory RNAs on IFN- $\beta$ .** Wild-type (WT) A549-Dual cells, RIG-I knockout A549-Dual cells, MDA5 knockout A549-Dual cells, or TLR3 knockout A549 cells were transfected with RNA-1, RNA-2, or a scramble RNA control and IFN- $\beta$  mRNA levels were detected by Quanti-Luc assay in WT, RIG-I KO, and MDA5 KO A549-Dual cells or qPCR in TLR3 KO A549 cells at 48 h post transfection. Data are shown as fold change relative to the scrambled RNA control (N = 6).

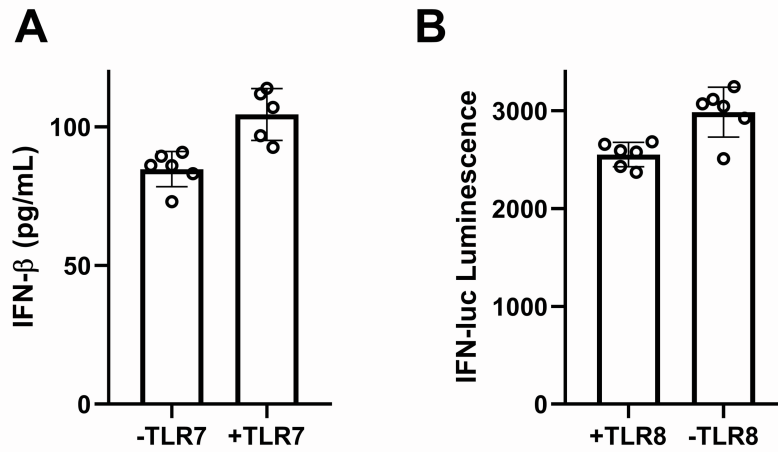

**Figure S7. TLR7/8 knockout or overexpression did not have effect on the immunostimulatory activity of RNA-1.** (A) Graph showing that the overexpression of TLR7 in HEK cells had no effect on production of IFN- $\beta$  induced by RNA-1. (B) Graph showing that the knockout of TLR8 in THP1 cells had no effect on IFN production induced by RNA-1. These cell lines are commercial and could be purchased from InvivoGen.



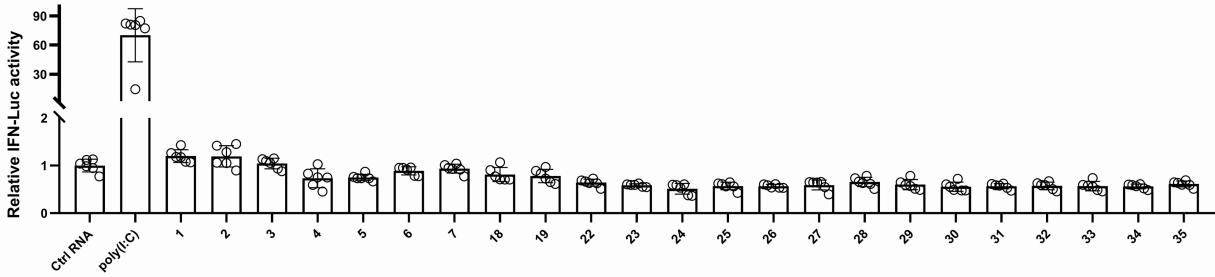

**Figure S8. RIG-I knockout completely abolished the immunostimulatory activity of RNAs.**

RIG-I knockout A549-Dual cells were transfected with poly (I:C), immunostimulatory RNAs or a scrambled RNA control (34 nM) and 48 h later, activation of the IFN pathway was measured by quantifying luciferase reporter activity. Data are shown as fold change relative to the scrambled RNA control (N = 6). Note that poly (I:C) induced potent production of IFN in RIG-I knockout A549-Dual cells, while the immunostimulatory RNAs did not induce IFN in RIG-I knockout A549-Dual cells.

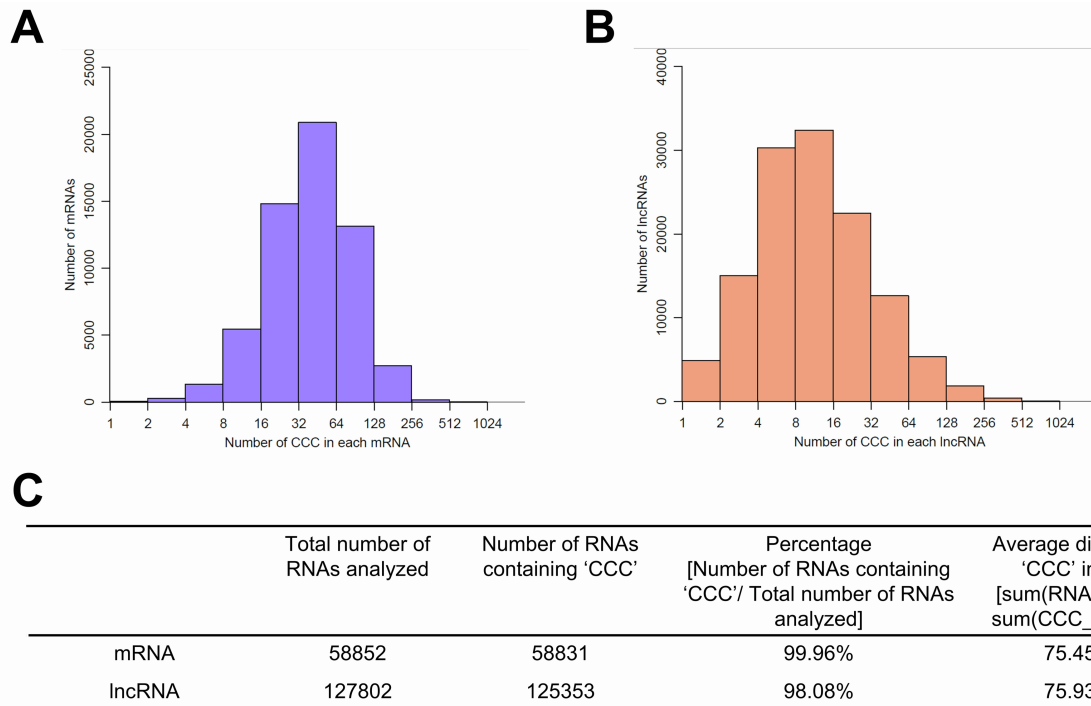

**Figure S9. 'CCC' motif is widely distributed in human genome.** (A) Graph showing the distribution of the number of CCC sequences in human mRNAs (retrieved from UCSC hg38 refGene with prefix NM). (B) Graph showing the distribution of the number of CCC sequences in human lncRNAs (retrieved from Incipedia). (C) Table showing the percentage of human mRNAs and lncRNAs containing the CCC motif and their average density.

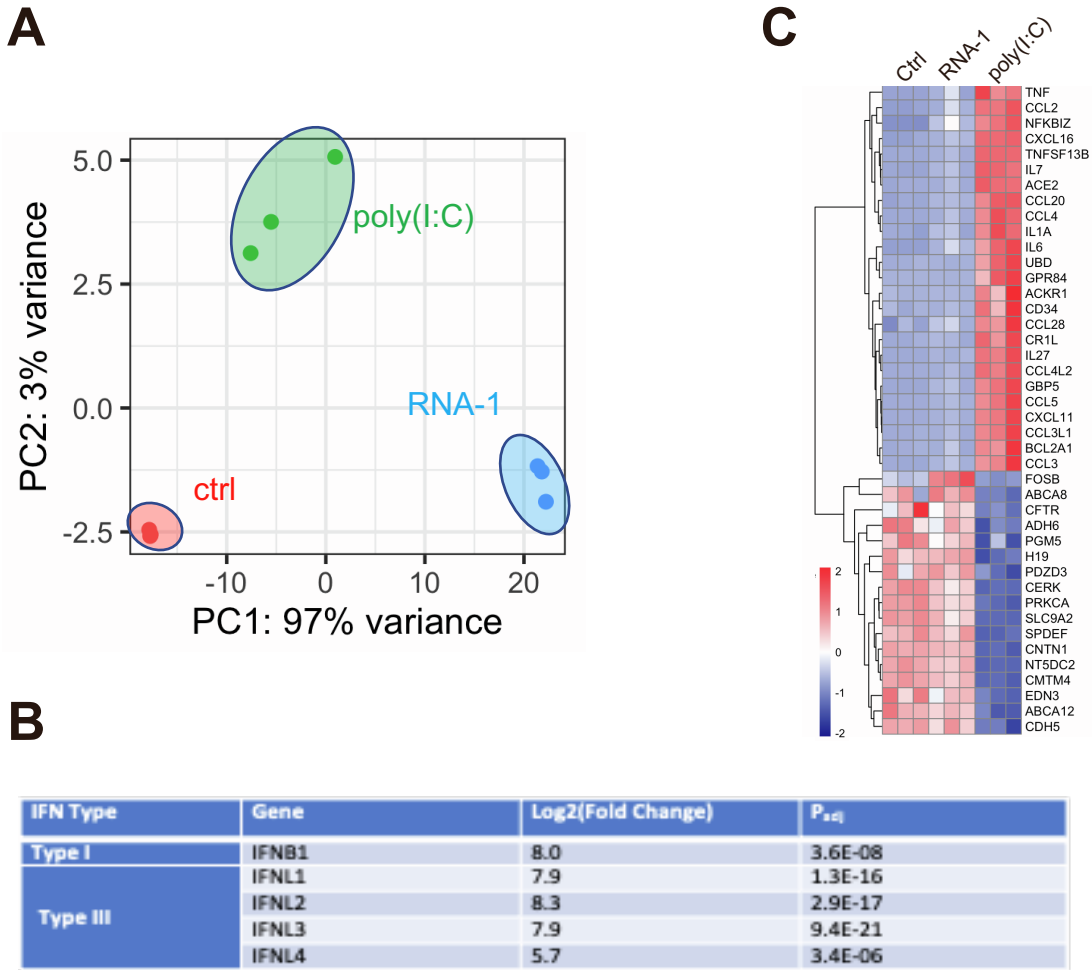

**Figure S10. RNA-seq analysis to characterize host responses induced by RNA-1 and poly(I:C).** (A) Principal component analysis of A549 cells transcriptomes when transfected with scrambled dsRNA (ctrl), RNA-1 (isRNA) or poly(I:C) for 48 hours. N=3. (B) Table showing induction of Type I and III IFN genes based on RNAseq data shown in **Fig. 5A**. (C) Heat map showing top upregulated inflammatory genes and top downregulated genes involved in ion transport and cell-cell adhesion in the poly(I:C) transfected but not in the isRNA (RNA-1) transfected A549 cells.

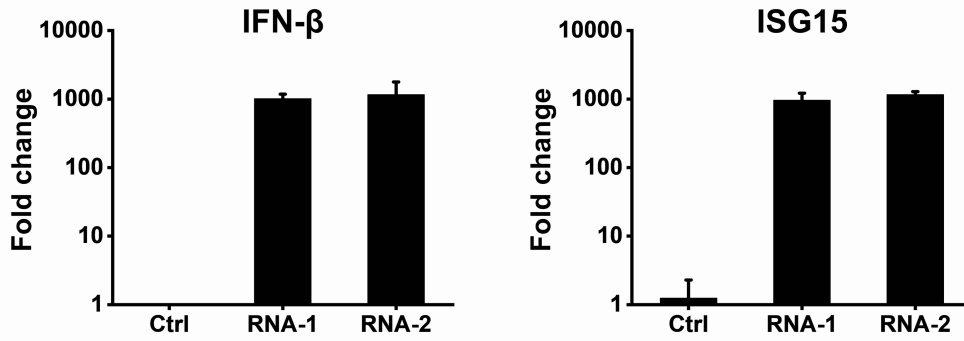

**Figure S11. Immunostimulatory RNA-mediated production of IFN in ACE2-overexpressing A549 cells.** IFN- $\beta$  and ISG15 levels were detected in cells transfected with RNA-1, RNA-2, or scramble dsRNA control by qPCR at 48 h post-transfection. The IFN- $\beta$  or ISG15 level induced by the scramble dsRNA control was set as 1. Data are shown as fold change relative to the control (N = 3).

**Table S1. Summary of characteristics of reported immunostimulatory RNAs.**

| <b>Characteristic</b>           | <b>Signaling pathway</b>  | <b>Cytokines</b>         |
|---------------------------------|---------------------------|--------------------------|
| 5'-UGUGU-3' motif               | Toll-like receptor (TLR)8 | IFN-alfa                 |
| 5'-GUCCUCAA-3' motif            | TLR7/8                    | IFN-alfa                 |
| GU or AU rich                   | TLR7/8                    | IFN-alfa, TNF-alfa       |
| Uracil repeats                  | TLR7                      | IFN-alfa, IL-6, TNF-alfa |
| Blunt ended dsRNA               | RIG-I                     | Type I IFN, p56          |
| 5'-triphosphate; 5'-diphosphate | RIG-I                     | IFN-alfa, IFN-beta       |
| MicroRNA-like siRNA             | TLR7/8                    | IFN-alfa, TNF-alfa       |
| Long dsRNA                      | MDA5                      | Type I IFN               |
| Long dsRNA                      | TLR3                      | Type I IFN               |
| Single stranded (ss)RNA         | TLR7                      | Type I IFN               |
